# Supplementary material for: Usefulness of Immunohistochemistry for Microsatellite Instability Screening in Gastric Cancer
Source: PubMed Central journal article supplement — Gut Liver. 2015 Sep 15;9(5):629–35. doi: 10.5009/gnl15133 (PMC4562780; doi:10.5009/gnl15133), 2015-09-15
Supplement: GNL-09-629-suppl.pdf [file GNL-09-629-suppl.pdf]

**Supplementary Table 1.** Univariate and Multivariate Survival Analysis according to the Clinicopathologic and Immunohistochemical Parameters

| Parameter                          | Univariate analysis |              |         | Multivariate analysis |             |         |
|------------------------------------|---------------------|--------------|---------|-----------------------|-------------|---------|
|                                    | HR                  | 95% CI       | p-value | HR                    | 95% CI      | p-value |
| hMLH1                              |                     |              |         |                       |             |         |
| Intact vs loss                     | 3.138               | 1.910–5.156  | <0.001  | 2.197                 | 1.298–3.721 | 0.003   |
| hMSH2                              |                     |              |         |                       |             |         |
| Intact vs loss                     | 4.127               | 0.576–29.582 | 0.158   | -                     | -           | -       |
| Age, yr                            |                     |              |         |                       |             |         |
| ≤60 vs >60                         | 0.928               | 0.634–1.358  | 0.700   | -                     | -           | -       |
| Gender                             |                     |              |         |                       |             |         |
| Male vs female                     | 1.277               | 0.861–1.896  | 0.224   | -                     | -           | -       |
| Tumor size, cm                     |                     |              |         |                       |             |         |
| ≤6 vs >6                           | 2.435               | 1.646–3.601  | <0.001  | 1.849                 | 1.220–2.801 | 0.004   |
| Tumor location                     |                     |              |         |                       |             |         |
| U/M <sup>†</sup> vs L <sup>‡</sup> | 0.913               | 0.616–1.352  | 0.650   | -                     | -           | -       |
| Borrmann's type                    |                     |              |         |                       |             |         |
| I/II vs III/IV                     | 3.109               | 1.871–5.167  | <0.001  | 1.712                 | 1.002–2.924 | 0.049   |
| Histologic type                    |                     |              |         |                       |             |         |
| Well/moderately vs poorly          | 1.711               | 1.130–2.591  | 0.011   | 0.656                 | 0.344–1.250 | 0.200   |
| Lauren's classification            |                     |              |         |                       |             |         |
| Intestinal vs diffuse              | 2.491               | 1.696–3.659  | <0.001  | 1.681                 | 0.928–3.047 | 0.087   |
| Depth of invasion                  |                     |              |         |                       |             |         |
| pT2/3 vs pT4                       | 4.076               | 2.691–6.173  | <0.001  | 2.148                 | 1.361–3.389 | 0.001   |
| Lymph node metastasis              |                     |              |         |                       |             |         |
| Absent vs present                  | 7.155               | 3.478–14.718 | <0.001  | 3.736                 | 1.773–7.874 | 0.001   |
| Distant metastasis                 |                     |              |         |                       |             |         |
| Absent vs present                  | 4.199               | 2.553–6.906  | <0.001  | 2.408                 | 1.438–4.030 | 0.001   |
| Lymphovascular invasion            |                     |              |         |                       |             |         |
| Absent vs present                  | 3.136               | 1.976–4.978  | <0.001  | 1.989                 | 1.235–3.202 | 0.005   |

HR, hazard ratio; CI, confidence interval; U/M, upper or middle; L, lower.
